# Supplementary material for: Social pain and physical pain: a cohort study to explore the association of social isolation and loneliness with chronic pain among older adults in China
Source: Research Square preprint supplement (doi:10.21203/rs.3.rs-4550828/v1), 2024-06-24
Supplement: Supplementary file 1 [file 2ec05a1ff1482075df07c9fc.docx]

**Table S1. The association of social isolation and loneliness with moderate/severe chronic by logistic regressions.**

| **Variables** | **Basic Model  OR (95% CI)** | **Interaction Correlation Model  OR (95% CI)** | **Combined Correlation Model OR (95% CI)** |
| --- | --- | --- | --- |
| Social isolation | 1.27 (1.02to1.57) | 1.24 (0.96 to1.61) | - |
| Loneliness | 1.53 (1.22 to 1.92) | 1.47 (1.02 to 2.11) | - |
| Social isolation * loneliness | - | 1.07 (0.67 to 1.69) | - |
| Low social isolation and not lonely | - | - | 1 [Reference] |
| High social isolation and lonely | - | - | 1,95 (1.45 to 2.62) |
| High social isolation and not lonely | - | - | 1.24 (0.96 to 1.61) |
| Low social isolation and lonely | - | - | 1.47 (1.02 to 2.11) |

OR: Odds Ratio; 95% CI: 95% Confidence Interval

Basic model: The exposure factors, outcome variable, and control variables (age, sex, education, household income level, smoke-ever, drink-ever, BMI, sleep level, and chronic diseases).

Interaction correlation model: Based on the basic model, the interaction of social isolation and loneliness was estimated.

Combined correlation model: Dummy variables of social isolation and loneliness, chronic pain, and control variables.

**Table S2. The association of social isolation and loneliness and chronic pain with the data of 2015 Wave in CHARLS by logistic regressions.**

| **Variables** | **Basic Model  OR (95% CI)** | **Interaction Correlation Model  OR (95% CI)** | **Combined Correlation Model OR (95% CI)** |
| --- | --- | --- | --- |
| Social isolation | 1.22 (1.01 to 1.48) | 1.29 (1.03 to 1.62) | - |
| Loneliness | 1.94 (1.59 to 2.38) | 2.19 (1.59 to 3.01) | - |
| Social isolation * loneliness | - | 0.82 (0.54 to 1.23) | - |
| Low social isolation and not lonely | - | - | 1 [Reference] |
| High social isolation and lonely | - | - | 2.32 (1.78 to 3.02) |
| High social isolation and not lonely | - | - | 1.29 (1.03 to 1.62) |
| Low social isolation and lonely | - | - | 2.19 (1.59 to 3.01) |

CHARLS, China Health and Retirement Longitudinal Study.

OR: Odds Ratio; 95% CI: 95% Confidence Interval

Basic model: The exposure factors, outcome variable, and control variables (age, sex, education, household income level, smoke-ever, drink-ever, BMI, sleep level, and chronic diseases).

Interaction correlation model: Based on the basic model, the interaction of social isolation and loneliness was estimated.

Combined correlation model: Dummy variables of social isolation and loneliness, chronic pain, and control variables.

**Table S3. The association of cross-year social isolation experience, cross-year loneliness experience and chronic pain by logistic regressions.**

| **Variables** | **Basic Model  OR (95% CI)** | **Interaction Correlation Model OR (95% CI)** |
| --- | --- | --- |
| Cross-Year Social Isolation Experience | 1.34 (1.08 to 1.66) | 1.24 (0.96 to 1.61) |
| Cross-Year Loneliness Experience | 1.57 (1.29 to 1.92) | 1.31 (0.89 to 1.92) |
| Social isolation * loneliness | - | 0.99 (0.82 to 1.99) |

OR: odds ratio; 95% CI: 95% confidence interval

Basic model: Cross-year social isolation experience, cross-year loneliness experience, chronic pain, and control variables (age, sex, education, household income level, smoke-ever, drink-ever, BMI, sleep level, and chronic diseases).

Interaction correlation model: Based on the Basic Model, the interaction of cross-year social isolation experience and cross-year loneliness experience was estimated.
